# Supplementary material for: Use of Antimicrobials by Class in Pigs in Germany—A Longitudinal Description Considering Different International Categorisation Systems
Source: MDPI journal article supplement (doi:10.3390/antibiotics11121833), 2022-12-16
Supplement: s1 [file s1]

## Supplementary Materials

**Table S1.** Treatment frequency for pigs in VetCAb study per production type and half year from 2013-1 to 2020-2.

| Production Type | Half-Year | Holdings | Treatment Frequency |        |                |        |                |       | Antimicrobial Usage |      |            |      |
|-----------------|-----------|----------|---------------------|--------|----------------|--------|----------------|-------|---------------------|------|------------|------|
|                 |           |          |                     |        |                |        |                |       | yes                 |      | no         |      |
|                 |           |          | Min                 | QRange | Lower Quartile | Median | Upper Quartile | Max   | N Holdings          | %    | N Holdings | %    |
| Piglet          | 2013-1    | 145      | -                   | 8.5    | 1.4            | 4.0    | 9.9            | 62.6  | 133                 | 91.7 | 12         | 8.3  |
|                 | 2013-2    | 139      | -                   | 5.1    | 0.6            | 2.7    | 5.6            | 67.7  | 117                 | 84.2 | 22         | 15.8 |
|                 | 2014-1    | 173      | -                   | 4.8    | 0.5            | 2.1    | 5.3            | 97.5  | 144                 | 83.2 | 29         | 16.8 |
|                 | 2014-2    | 194      | -                   | 4.2    | 0.3            | 1.8    | 4.5            | 48.6  | 154                 | 79.4 | 40         | 20.6 |
|                 | 2015-1    | 250      | -                   | 6.9    | 0.3            | 2.4    | 7.2            | 170.7 | 195                 | 78.0 | 55         | 22.0 |
|                 | 2015-2    | 248      | -                   | 5.7    | 0.2            | 1.8    | 5.8            | 137.4 | 192                 | 77.4 | 56         | 22.6 |
|                 | 2016-1    | 147      | -                   | 11.2   | 0.2            | 2.1    | 11.4           | 251.0 | 115                 | 78.2 | 32         | 21.8 |
|                 | 2016-2    | 150      | -                   | 9.9    | -              | 1.7    | 9.9            | 234.6 | 111                 | 74.0 | 39         | 26.0 |
|                 | 2017-1    | 169      | -                   | 10.8   | 0.1            | 2.3    | 10.9           | 190.2 | 131                 | 77.5 | 38         | 22.5 |
|                 | 2017-2    | 170      | -                   | 10.3   | 0.1            | 1.9    | 10.3           | 174.4 | 128                 | 75.3 | 42         | 24.7 |
|                 | 2018-1    | 177      | -                   | 11.3   | -              | 2.6    | 11.3           | 289.6 | 130                 | 73.4 | 47         | 26.6 |
|                 | 2018-2    | 178      | -                   | 10.6   | -              | 2.3    | 10.6           | 367.8 | 117                 | 65.7 | 61         | 34.3 |
|                 | 2019-1    | 178      | -                   | 11.0   | -              | 2.5    | 11.0           | 355.7 | 122                 | 68.5 | 56         | 31.5 |
|                 | 2019-2    | 179      | -                   | 7.8    | -              | 1.0    | 7.8            | 297.6 | 116                 | 64.8 | 63         | 35.2 |
|                 | 2020-1    | 177      | -                   | 4.5    | -              | 0.9    | 4.5            | 193.5 | 111                 | 62.7 | 66         | 37.3 |
|                 | 2020-2    | 177      | -                   | 4.4    | -              | 0.8    | 4.4            | 126.9 | 107                 | 60.5 | 70         | 39.5 |
| Sow             | 2013-1    | 145      | -                   | 5.2    | 0.2            | 1.0    | 5.4            | 63.0  | 123                 | 84.8 | 22         | 15.2 |
|                 | 2013-2    | 139      | -                   | 4.4    | 0.2            | 1.1    | 4.6            | 50.4  | 116                 | 83.5 | 23         | 16.5 |
|                 | 2014-1    | 173      | -                   | 3.4    | 0.4            | 1.3    | 3.8            | 369.9 | 152                 | 87.9 | 21         | 12.1 |
|                 | 2014-2    | 194      | -                   | 4.6    | 0.3            | 1.2    | 4.9            | 127.6 | 169                 | 87.1 | 25         | 12.9 |
|                 | 2015-1    | 258      | -                   | 2.7    | 0.2            | 0.9    | 2.9            | 50.5  | 208                 | 80.6 | 50         | 19.4 |
|                 | 2015-2    | 256      | -                   | 1.9    | 0.1            | 0.6    | 2.0            | 38.2  | 198                 | 77.3 | 58         | 22.7 |
|                 | 2016-1    | 155      | -                   | 2.2    | 0.1            | 0.7    | 2.3            | 27.2  | 121                 | 78.1 | 34         | 21.9 |
|                 | 2016-2    | 158      | -                   | 2.2    | 0.1            | 0.7    | 2.3            | 26.5  | 122                 | 77.2 | 36         | 22.8 |
|                 | 2017-1    | 177      | -                   | 2.8    | 0.2            | 1.0    | 3.0            | 50.4  | 141                 | 79.7 | 36         | 20.3 |
|                 | 2017-2    | 178      | -                   | 2.7    | 0.2            | 0.8    | 2.9            | 35.1  | 141                 | 79.2 | 37         | 20.8 |
|                 | 2018-1    | 185      | -                   | 3.3    | 0.1            | 0.8    | 3.4            | 34.2  | 142                 | 76.8 | 43         | 23.2 |
|                 | 2018-2    | 186      | -                   | 2.8    | -              | 0.7    | 2.8            | 46.1  | 139                 | 74.7 | 47         | 25.3 |
|                 | 2019-1    | 186      | -                   | 2.2    | -              | 0.7    | 2.2            | 33.8  | 130                 | 69.9 | 56         | 30.1 |
|                 | 2019-2    | 187      | -                   | 2.9    | -              | 0.7    | 2.9            | 47.9  | 135                 | 72.2 | 52         | 27.8 |
|                 | 2020-1    | 185      | -                   | 2.4    | -              | 0.6    | 2.4            | 54.1  | 126                 | 68.1 | 59         | 31.9 |
|                 | 2020-2    | 185      | -                   | 2.1    | -              | 0.6    | 2.1            | 57.7  | 121                 | 65.4 | 64         | 34.6 |
| Weaner          | 2013-1    | 156      | -                   | 24.9   | 0.0            | 7.4    | 25.0           | 264.9 | 118                 | 75.6 | 38         | 24.4 |
|                 | 2013-2    | 156      | -                   | 35.3   | -              | 8.6    | 35.3           | 348.8 | 113                 | 72.4 | 43         | 27.6 |
|                 | 2014-1    | 205      | -                   | 43.4   | 0.8            | 11.6   | 44.2           | 414.6 | 167                 | 81.5 | 38         | 18.5 |
|                 | 2014-2    | 217      | -                   | 27.1   | -              | 7.0    | 27.1           | 142.9 | 160                 | 73.7 | 57         | 26.3 |
|                 | 2015-1    | 305      | -                   | 13.6   | -              | 2.9    | 13.6           | 104.1 | 213                 | 69.8 | 92         | 30.2 |
|                 | 2015-2    | 298      | -                   | 9.3    | -              | 1.5    | 9.3            | 93.0  | 203                 | 68.1 | 95         | 31.9 |
|                 | 2016-1    | 196      | -                   | 8.0    | -              | 0.9    | 8.0            | 115.4 | 122                 | 62.2 | 74         | 37.8 |
|                 | 2016-2    | 199      | -                   | 9.1    | -              | 1.0    | 9.1            | 125.0 | 125                 | 62.8 | 74         | 37.2 |
|                 | 2017-1    | 213      | -                   | 7.7    | -              | 1.3    | 7.7            | 97.6  | 142                 | 66.7 | 71         | 33.3 |
|                 | 2017-2    | 214      | -                   | 7.2    | -              | 0.9    | 7.2            | 90.5  | 137                 | 64.0 | 77         | 36.0 |
|                 | 2018-1    | 222      | -                   | 6.9    | -              | 0.9    | 6.9            | 162.3 | 141                 | 63.5 | 81         | 36.5 |

| Production Type | Half-Year | Holdings | Treatment Frequency |        |                |        |                |       | Antimicrobial Usage |      |          |      |
|-----------------|-----------|----------|---------------------|--------|----------------|--------|----------------|-------|---------------------|------|----------|------|
|                 |           |          | Min                 | QRange | Lower Quartile | Median | Upper Quartile | Max   | yes                 |      | no       |      |
|                 |           |          |                     |        |                |        |                |       | N                   |      | N        |      |
|                 |           |          |                     |        |                |        |                |       | Holdings            | %    | Holdings | %    |
| Fattening Pig   | 2018-2    | 223      | -                   | 6.3    | -              | 0.7    | 6.3            | 121.1 | 134                 | 60.1 | 89       | 39.9 |
|                 | 2019-1    | 223      | -                   | 6.5    | -              | 0.7    | 6.5            | 55.0  | 132                 | 59.2 | 91       | 40.8 |
|                 | 2019-2    | 223      | -                   | 5.0    | -              | 0.3    | 5.0            | 42.3  | 131                 | 58.7 | 92       | 41.3 |
|                 | 2020-1    | 221      | -                   | 4.7    | -              | 0.3    | 4.7            | 71.6  | 131                 | 59.3 | 90       | 40.7 |
|                 | 2020-2    | 221      | -                   | 5.7    | -              | 0.3    | 5.7            | 99.8  | 128                 | 57.9 | 93       | 42.1 |
|                 | 2013-1    | 413      | -                   | 11.6   | 0.1            | 2.5    | 11.7           | 158.6 | 319                 | 77.2 | 94       | 22.8 |
|                 | 2013-2    | 443      | -                   | 9.9    | 0.0            | 2.4    | 9.9            | 258.6 | 341                 | 77.0 | 102      | 23.0 |
|                 | 2014-1    | 545      | -                   | 7.8    | 0.0            | 1.0    | 7.9            | 285.6 | 410                 | 75.2 | 135      | 24.8 |
|                 | 2014-2    | 559      | -                   | 6.6    | 0.1            | 0.7    | 6.7            | 280.0 | 440                 | 78.7 | 119      | 21.3 |
|                 | 2015-1    | 768      | -                   | 2.5    | -              | 0.2    | 2.5            | 52.3  | 492                 | 64.1 | 276      | 35.9 |
|                 | 2015-2    | 759      | -                   | 2.5    | -              | 0.2    | 2.5            | 44.1  | 497                 | 65.5 | 262      | 34.5 |
|                 | 2016-1    | 434      | -                   | 2.4    | -              | 0.1    | 2.4            | 40.5  | 261                 | 60.1 | 173      | 39.9 |
|                 | 2016-2    | 436      | -                   | 2.4    | -              | 0.1    | 2.4            | 143.8 | 267                 | 61.2 | 169      | 38.8 |
|                 | 2017-1    | 466      | -                   | 2.2    | -              | 0.2    | 2.2            | 150.9 | 300                 | 64.4 | 166      | 35.6 |
|                 | 2017-2    | 468      | -                   | 2.8    | -              | 0.2    | 2.8            | 119.7 | 310                 | 66.2 | 158      | 33.8 |
|                 | 2018-1    | 480      | -                   | 2.2    | -              | 0.1    | 2.2            | 45.9  | 295                 | 61.5 | 185      | 38.5 |
|                 | 2018-2    | 481      | -                   | 1.7    | -              | 0.1    | 1.7            | 163.8 | 286                 | 59.5 | 195      | 40.5 |
|                 | 2019-1    | 482      | -                   | 2.0    | -              | 0.1    | 2.0            | 163.6 | 292                 | 60.6 | 190      | 39.4 |
|                 | 2019-2    | 482      | -                   | 1.4    | -              | 0.1    | 1.4            | 93.1  | 300                 | 62.2 | 182      | 37.8 |
|                 | 2020-1    | 479      | -                   | 1.7    | -              | 0.1    | 1.7            | 108.7 | 294                 | 61.4 | 185      | 38.6 |
|                 | 2020-2    | 479      | -                   | 1.3    | -              | 0.1    | 1.3            | 202.5 | 291                 | 60.8 | 188      | 39.2 |

Min: minimum, QRange: range between minimum and maximum, Max: maximum, N Holdings: number of farms.

**Table S2.** Weighted treatment frequency per indication in piglets (%) in VetCAB study per half year from 2013-1 to 2020-2.

[illegible]

**Table S3.** Weighted treatment frequency per indication in sows (%) in VetCab study per half year from 2013-1 to 2020-2.

[illegible]

**Table S4.** Weighted treatment frequency per indication in weaners (%) in VetCab study per half year from 2013-1 to 2020-2.

[illegible]

**Table S5.** Weighted treatment frequency per indication in fattening pigs(%) in VetCab study per half year from 2013-1 to 2020-2.

[illegible]

**Table S6. Weighted treatment frequency per active substance in piglets (%) in VetCAB study per half year from 2013-1 to 2020-2.**

| <b>Drug class</b>         | <b>13-1</b> | <b>13-2</b> | <b>14-1</b> | <b>14-2</b> | <b>15-1</b> | <b>15-2</b> | <b>16-1</b> | <b>16-2</b> | <b>17-1</b> | <b>17-2</b> | <b>18-1</b> | <b>18-2</b> | <b>19-1</b> | <b>19-2</b> | <b>20-1</b> | <b>20-2</b> |
|---------------------------|-------------|-------------|-------------|-------------|-------------|-------------|-------------|-------------|-------------|-------------|-------------|-------------|-------------|-------------|-------------|-------------|
| <b>Active Substance</b>   |             |             |             |             |             |             |             |             |             |             |             |             |             |             |             |             |
| <b>Σ Amphenicoles</b>     | <b>0.2</b>  | <b>0.8</b>  | <b>0.0</b>  | <b>0.4</b>  | <b>0.4</b>  | <b>0.3</b>  | <b>0.1</b>  | <b>0.4</b>  | <b>0.2</b>  | <b>.</b>    | <b>0.1</b>  | <b>0.3</b>  | <b>0.1</b>  | <b>0.0</b>  | <b>0.1</b>  | <b>0.1</b>  |
| Florfenicol               | 0.2         | 0.8         | 0.0         | 0.4         | 0.4         | 0.3         | 0.1         | 0.4         | 0.2         | .           | 0.1         | 0.3         | 0.1         | 0.0         | 0.1         | 0.1         |
| <b>Σ Aminoglycosides</b>  | <b>11.8</b> | <b>10.5</b> | <b>11.1</b> | <b>7.1</b>  | <b>9.7</b>  | <b>10.8</b> | <b>18.0</b> | <b>12.9</b> | <b>19.6</b> | <b>16.0</b> | <b>12.2</b> | <b>13.6</b> | <b>10.7</b> | <b>16.2</b> | <b>22.3</b> | <b>2.7</b>  |
| Apramycin                 | 0.4         | 0.4         | 0.8         | 0.5         | 0.3         | 0.4         | 0.1         | 0.1         | 0.2         | 0.2         | 0.1         | 0.1         | 0.2         | 1.0         | 0.6         | 1.0         |
| Dihydrostreptomycin       | 9.2         | 7.2         | 6.0         | 5.3         | 8.4         | 9.0         | 15.8        | 11.1        | 17.3        | 14.4        | 11.2        | 12.0        | 8.7         | 13.9        | 19.7        | 0.0         |
| Gentamicin                | 0.7         | 1.2         | 0.7         | 0.5         | 0.7         | 0.8         | 1.5         | 1.2         | 1.6         | 0.7         | 0.6         | 0.1         | 0.0         | 0.0         | 0.1         | 0.1         |
| Neomycin                  | 1.3         | 1.6         | 3.5         | 0.8         | .           | 0.3         | 0.0         | 0.1         | .           | 0.0         | .           | .           | .           | .           | .           | .           |
| Paromomycin               | .           | .           | .           | .           | .           | .           | .           | .           | .           | .           | .           | 0.8         | 1.2         | 0.9         | 1.5         | 1.4         |
| Spectinomycin             | 0.2         | 0.1         | 0.1         | 0.1         | 0.2         | 0.3         | 0.5         | 0.3         | 0.4         | 0.6         | 0.4         | 0.6         | 0.6         | 0.4         | 0.5         | 0.2         |
| <b>Σ Cephalosporins*</b>  | <b>2.3</b>  | <b>2.3</b>  | <b>2.3</b>  | <b>2.8</b>  | <b>5.8</b>  | <b>4.3</b>  | <b>5.7</b>  | <b>7.4</b>  | <b>2.8</b>  | <b>6.7</b>  | <b>3.8</b>  | <b>2.6</b>  | <b>1.0</b>  | <b>1.7</b>  | <b>0.4</b>  | <b>3.4</b>  |
| Cefquinome                | 0.4         | 0.1         | 0.4         | 0.1         | 0.2         | 0.2         | 0.2         | 0.4         | 0.3         | 0.2         | 0.1         | 0.0         | 0.1         | 0.1         | 0.2         | 0.3         |
| Ceftiofur                 | 1.9         | 2.2         | 1.9         | 2.6         | 5.6         | 4.1         | 5.5         | 7.1         | 2.5         | 6.5         | 3.7         | 2.6         | 0.9         | 1.6         | 0.2         | 3.1         |
| <b>Σ Fluoroquinolones</b> | <b>4.3</b>  | <b>6.2</b>  | <b>5.4</b>  | <b>4.3</b>  | <b>5.8</b>  | <b>4.3</b>  | <b>6.9</b>  | <b>6.9</b>  | <b>10.4</b> | <b>8.7</b>  | <b>5.0</b>  | <b>1.8</b>  | <b>2.3</b>  | <b>4.6</b>  | <b>6.7</b>  | <b>5.9</b>  |
| Danofloxacin              | 0.1         | 0.1         | 0.1         | 0.2         | 0.4         | 0.3         | 0.4         | 0.3         | 0.6         | 0.8         | 0.6         | 0.2         | 0.5         | 0.8         | 0.5         | 0.3         |
| Enrofloxacin              | 4.0         | 5.9         | 5.0         | 4.0         | 5.3         | 3.9         | 6.5         | 6.4         | 9.7         | 7.8         | 4.4         | 1.5         | 1.8         | 3.8         | 6.2         | 5.5         |
| Marbofloxacin             | 0.2         | 0.1         | 0.3         | 0.1         | 0.1         | 0.1         | .           | 0.2         | 0.1         | 0.0         | 0.0         | .           | 0.0         | 0.0         | 0.0         | 0.0         |
| <b>Σ Lincosamides</b>     | <b>1.6</b>  | <b>0.7</b>  | <b>0.3</b>  | <b>0.0</b>  | <b>0.0</b>  | <b>0.0</b>  | <b>0.0</b>  | <b>.</b>    | <b>.</b>    | <b>.</b>    | <b>.</b>    | <b>.</b>    | <b>0.0</b>  | <b>.</b>    | <b>0.0</b>  | <b>.</b>    |
| Lincomycin                | 1.6         | 0.7         | 0.3         | 0.0         | 0.0         | 0.0         | 0.0         | .           | .           | .           | .           | .           | 0.0         | .           | 0.0         | .           |
| <b>Σ Macrolides</b>       | <b>7.2</b>  | <b>10.2</b> | <b>12.7</b> | <b>17.7</b> | <b>25.3</b> | <b>22.6</b> | <b>8.9</b>  | <b>12.7</b> | <b>14.2</b> | <b>16.7</b> | <b>25.8</b> | <b>32.0</b> | <b>35.4</b> | <b>34.4</b> | <b>10.8</b> | <b>34.8</b> |
| Gamithromycin             | .           | .           | .           | .           | .           | .           | .           | 0.1         | 0.2         | .           | .           | .           | .           | .           | .           | .           |
| Tildipirosin              | 0.0         | 0.0         | 0.1         | 0.1         | 0.5         | 1.1         | 0.8         | 1.0         | 0.9         | 1.5         | 0.5         | 1.1         | 0.6         | 0.2         | 0.9         | 0.3         |
| Tilmicosin                | .           | 0.2         | .           | .           | .           | .           | .           | .           | .           | .           | .           | .           | .           | .           | .           | .           |
| Tulathromycin             | 4.8         | 7.5         | 9.7         | 17.6        | 24.8        | 21.5        | 8.0         | 11.6        | 13.1        | 15.0        | 25.2        | 30.8        | 34.7        | 34.1        | 9.9         | 34.4        |
| Tylosin                   | 2.3         | 2.3         | 2.9         | 0.1         | 0.0         | 0.0         | 0.1         | 0.0         | 0.0         | 0.2         | 0.1         | 0.1         | 0.1         | 0.1         | 0.0         | 0.0         |
| <b>Σ Penicillins</b>      | <b>34.2</b> | <b>41.6</b> | <b>42.3</b> | <b>42.7</b> | <b>41.1</b> | <b>50.6</b> | <b>59.0</b> | <b>58.9</b> | <b>51.0</b> | <b>50.5</b> | <b>40.6</b> | <b>43.8</b> | <b>44.5</b> | <b>36.9</b> | <b>53.7</b> | <b>45.3</b> |
| Amoxicillin               | 22.1        | 26.7        | 31.0        | 36.2        | 31.1        | 40.6        | 41.4        | 45.2        | 33.3        | 35.3        | 29.0        | 31.4        | 35.1        | 22.6        | 31.4        | 44.1        |
| Ampicillin                | .           | 0.5         | .           | .           | .           | .           | .           | .           | .           | .           | .           | .           | .           | .           | .           | .           |
| Benzylpenicilin           | 12.1        | 14.5        | 11.3        | 6.6         | 10.1        | 10.0        | 17.6        | 13.7        | 17.7        | 15.1        | 11.6        | 12.4        | 9.3         | 14.3        | 22.4        | 1.2         |
| <b>Σ Pleuromutilins</b>   | <b>0.4</b>  | <b>0.1</b>  | <b>.</b>    | <b>0.1</b>  | <b>0.1</b>  | <b>.</b>    |
| Tiamulin                  | 0.4         | 0.1         | .           | 0.1         | 0.1         | .           | .           | .           | .           | .           | .           | .           | .           | .           | .           | .           |
| <b>Σ Polymyxins</b>       | <b>14.5</b> | <b>11.6</b> | <b>16.4</b> | <b>12.3</b> | <b>8.9</b>  | <b>5.1</b>  | <b>0.3</b>  | <b>0.2</b>  | <b>0.7</b>  | <b>0.5</b>  | <b>0.6</b>  | <b>1.1</b>  | <b>4.1</b>  | <b>4.0</b>  | <b>4.5</b>  | <b>5.8</b>  |
| Colistin                  | 5.6         | 6.0         | 14.5        | 11.0        | 8.5         | 5.1         | 0.3         | 0.2         | 0.7         | 0.5         | 0.6         | 1.1         | 4.1         | 4.0         | 4.5         | 5.8         |
| With ZnO                  | 8.9         | 5.6         | 1.9         | 1.3         | 0.4         | .           | .           | .           | .           | .           | .           | .           | .           | .           | .           | .           |
| <b>Σ Sulfonamides</b>     | <b>5.9</b>  | <b>4.1</b>  | <b>1.4</b>  | <b>2.1</b>  | <b>0.6</b>  | <b>0.7</b>  | <b>0.2</b>  | <b>0.1</b>  | <b>0.5</b>  | <b>.</b>    | <b>1.6</b>  | <b>0.1</b>  | <b>0.0</b>  | <b>0.0</b>  | <b>0.1</b>  | <b>0.2</b>  |
| Sulfadiazine              | 5.8         | 4.1         | 1.2         | 1.4         | .           | 0.4         | .           | .           | 0.5         | .           | .           | .           | .           | .           | .           | .           |
| Sulfadimethoxine          | .           | .           | .           | .           | 0.3         | .           | .           | .           | .           | .           | 1.6         | .           | .           | .           | .           | .           |
| Sulfadimidine             | 0.1         | 0.0         | 0.0         | 0.0         | 0.1         | 0.2         | 0.2         | 0.1         | 0.0         | .           | 0.0         | 0.1         | 0.0         | 0.0         | 0.1         | 0.1         |
| Sulfadoxine               | 0.1         | 0.0         | 0.3         | 0.6         | 0.2         | 0.0         | .           | .           | .           | .           | .           | .           | .           | 0.0         | 0.0         | 0.0         |
| <b>Σ Tetracyclines</b>    | <b>11.6</b> | <b>7.8</b>  | <b>6.5</b>  | <b>8.3</b>  | <b>1.8</b>  | <b>0.8</b>  | <b>0.7</b>  | <b>0.4</b>  | <b>0.1</b>  | <b>0.9</b>  | <b>8.5</b>  | <b>4.8</b>  | <b>2.0</b>  | <b>2.0</b>  | <b>1.3</b>  | <b>1.8</b>  |
| Chlortetracycline         | 0.8         | 0.7         | 1.9         | 6.9         | 0.1         | 0.1         | .           | .           | .           | 0.0         | .           | .           | .           | 0.0         | .           | .           |
| Doxycycline               | 6.4         | 5.7         | 3.4         | 1.4         | 1.1         | 0.2         | 0.1         | 0.3         | .           | .           | 2.5         | 0.6         | 0.3         | 0.6         | 0.3         | 0.4         |
| Oxytetracycline           | 0.1         | 0.0         | 0.1         | 0.0         | 0.4         | 0.4         | 0.6         | 0.2         | 0.1         | 0.8         | 6.0         | 4.2         | 1.6         | 1.4         | 1.0         | 1.4         |
| Tetracycline              | 4.4         | 1.4         | 1.1         | 0.0         | 0.1         | 0.0         | .           | 0.0         | 0.0         | 0.1         | .           | .           | .           | .           | .           | .           |
| <b>Σ Trimethoprim</b>     | <b>5.9</b>  | <b>4.1</b>  | <b>1.4</b>  | <b>2.1</b>  | <b>0.6</b>  | <b>0.7</b>  | <b>0.2</b>  | <b>0.1</b>  | <b>0.5</b>  | <b>.</b>    | <b>1.6</b>  | <b>0.1</b>  | <b>0.0</b>  | <b>0.0</b>  | <b>0.1</b>  | <b>0.2</b>  |
| Trimethoprim              | 5.9         | 4.1         | 1.4         | 2.1         | 0.6         | 0.7         | 0.2         | 0.1         | 0.5         | .           | 1.6         | 0.1         | 0.0         | 0.0         | 0.1         | 0.2         |
| <b>Σ TFw%</b>             | <b>100</b>  |

\*Cephalosporins: Cephalosporins of the third and fourth generation, TFw%: weighted treatment frequency in percent, 13-1 to 20-2: 2013-1 to 2020-2.

**Table S7.** Weighted treatment frequency per active substance in sows (%) in VetCAB study per half year from 2013-1 to 2020-2.

| <b>Drug class</b>         | <b>13-1</b> | <b>13-2</b> | <b>14-1</b> | <b>14-2</b> | <b>15-1</b> | <b>15-2</b> | <b>16-1</b> | <b>16-2</b> | <b>17-1</b> | <b>17-2</b> | <b>18-1</b> | <b>18-2</b> | <b>19-1</b> | <b>19-2</b> | <b>20-1</b> | <b>20-2</b> |
|---------------------------|-------------|-------------|-------------|-------------|-------------|-------------|-------------|-------------|-------------|-------------|-------------|-------------|-------------|-------------|-------------|-------------|
| Active Substance          |             |             |             |             |             |             |             |             |             |             |             |             |             |             |             |             |
| <b>Σ Amphenicoles</b>     | <b>0.2</b>  | <b>0.1</b>  | <b>0.2</b>  | <b>0.2</b>  | <b>1.0</b>  | <b>1.3</b>  | <b>1.0</b>  | <b>1.8</b>  | <b>0.5</b>  | <b>0.5</b>  | <b>0.5</b>  | <b>1.9</b>  | <b>2.6</b>  | <b>1.4</b>  | <b>0.8</b>  | <b>1.2</b>  |
| Florfenicol               | 0.2         | 0.1         | 0.2         | 0.2         | 1.0         | 1.3         | 1.0         | 1.8         | 0.5         | 0.5         | 0.5         | 1.9         | 2.6         | 1.4         | 0.8         | 1.2         |
| <b>Σ Aminoglycosides</b>  | <b>1.0</b>  | <b>5.5</b>  | <b>0.9</b>  | <b>2.4</b>  | <b>4.1</b>  | <b>1.1</b>  | <b>2.7</b>  | <b>1.3</b>  | <b>1.3</b>  | <b>0.5</b>  | <b>0.9</b>  | <b>0.4</b>  | <b>1.2</b>  | <b>1.0</b>  | <b>2.3</b>  | <b>0.4</b>  |
| Apramycin                 | 0.1         | .           | 0.0         | 0.1         | 0.1         | .           | .           | .           | .           | .           | .           | .           | .           | .           | 2.0         | .           |
| Dihydrostreptomycin       | 0.1         | 4.7         | 0.2         | 1.2         | 1.7         | .           | 0.7         | .           | 0.8         | .           | 0.4         | .           | 0.5         | 0.8         | .           | .           |
| Gentamicin                | 0.0         | 0.0         | 0.1         | 0.6         | 1.1         | 0.2         | 0.7         | .           | 0.0         | .           | 0.2         | .           | .           | 0.0         | .           | 0.3         |
| Neomycin                  | 0.0         | 0.0         | 0.0         | .           | .           | .           | 0.8         | 0.8         | 0.2         | 0.2         | .           | .           | 0.4         | .           | .           | .           |
| Spectinomycin             | 0.8         | 0.8         | 0.6         | 0.6         | 1.2         | 0.9         | 0.4         | 0.5         | 0.2         | 0.3         | 0.3         | 0.4         | 0.3         | 0.1         | 0.3         | 0.2         |
| <b>Σ Cephalosporins*</b>  | <b>2.1</b>  | <b>1.9</b>  | <b>1.9</b>  | <b>1.8</b>  | <b>4.3</b>  | <b>3.0</b>  | <b>1.9</b>  | <b>2.3</b>  | <b>1.6</b>  | <b>1.6</b>  | <b>1.3</b>  | <b>0.7</b>  | <b>1.2</b>  | <b>2.7</b>  | <b>0.7</b>  | <b>2.6</b>  |
| Cefquinome                | 1.8         | 1.6         | 1.7         | 1.4         | 2.6         | 2.4         | 1.7         | 2.2         | 1.6         | 1.5         | 1.0         | 0.5         | 1.2         | 0.7         | 0.7         | 0.7         |
| Ceftiofur                 | 0.3         | 0.3         | 0.2         | 0.4         | 1.7         | 0.6         | 0.2         | 0.1         | 0.0         | 0.1         | 0.3         | 0.2         | .           | 1.9         | .           | 1.9         |
| <b>Σ Fluoroquinolones</b> | <b>7.9</b>  | <b>6.4</b>  | <b>5.6</b>  | <b>4.1</b>  | <b>7.5</b>  | <b>11.4</b> | <b>9.3</b>  | <b>10.2</b> | <b>5.7</b>  | <b>6.8</b>  | <b>6.1</b>  | <b>2.0</b>  | <b>8.6</b>  | <b>2.0</b>  | <b>2.2</b>  | <b>1.5</b>  |
| Danofloxacin              | 1.0         | 0.3         | 0.7         | 0.2         | 0.3         | 0.4         | 0.2         | 0.1         | 0.2         | 0.2         | 0.1         | 0.0         | 0.2         | 0.0         | 0.0         | 0.0         |
| Enrofloxacin              | 6.0         | 5.3         | 3.6         | 2.7         | 4.2         | 7.9         | 6.9         | 6.8         | 4.0         | 4.6         | 4.3         | 1.1         | 1.2         | 1.2         | 1.4         | 0.7         |
| Marbofloxacin             | 0.9         | 0.7         | 1.2         | 1.2         | 3.0         | 3.1         | 2.1         | 3.3         | 1.4         | 1.9         | 1.7         | 0.9         | 7.2         | 0.8         | 0.7         | 0.7         |
| <b>Σ Lincosamides</b>     | <b>1.6</b>  | <b>0.8</b>  | <b>0.6</b>  | <b>0.9</b>  | <b>1.6</b>  | <b>1.1</b>  | <b>0.3</b>  | <b>0.5</b>  | <b>0.2</b>  | <b>0.5</b>  | <b>0.3</b>  | <b>0.4</b>  | <b>0.3</b>  | <b>0.2</b>  | <b>0.3</b>  | <b>0.2</b>  |
| Lincomycin                | 1.6         | 0.8         | 0.6         | 0.9         | 1.6         | 1.1         | 0.3         | 0.5         | 0.2         | 0.5         | 0.3         | 0.4         | 0.3         | 0.2         | 0.3         | 0.2         |
| <b>Σ Macrolides</b>       | <b>31.5</b> | <b>2.9</b>  | <b>1.9</b>  | <b>5.3</b>  | <b>7.7</b>  | <b>6.7</b>  | <b>1.8</b>  | <b>2.5</b>  | <b>2.6</b>  | <b>2.2</b>  | <b>2.7</b>  | <b>5.1</b>  | <b>7.5</b>  | <b>5.2</b>  | <b>5.1</b>  | <b>4.7</b>  |
| Erythromycin              | 0.0         | .           | .           | .           | 0.0         | .           | .           | .           | .           | .           | .           | .           | .           | .           | .           | .           |
| Gamithromycin             | .           | .           | .           | .           | .           | .           | .           | .           | .           | .           | .           | .           | .           | .           | 0.0         | .           |
| Tildipirosin              | 0.0         | 0.0         | 0.0         | .           | 1.1         | .           | 0.3         | 0.3         | .           | 0.1         | 0.1         | 0.1         | .           | 0.0         | 0.0         | 0.0         |
| Tilmicosin                | .           | .           | .           | .           | .           | .           | .           | .           | .           | .           | .           | .           | .           | .           | 0.6         | .           |
| Tulathromycin             | 0.7         | 0.3         | 0.8         | 3.7         | 5.4         | 5.3         | 1.2         | 1.9         | 2.0         | 1.3         | 2.3         | 3.9         | 7.0         | 4.8         | 3.6         | 4.5         |
| Tylosin                   | 30.8        | 2.6         | 1.0         | 1.6         | 1.2         | 1.4         | 0.2         | 0.3         | 0.6         | 0.8         | 0.4         | 1.1         | 0.5         | 0.4         | 0.9         | 0.2         |
| <b>Σ Penicillins</b>      | <b>13.9</b> | <b>20.2</b> | <b>28.8</b> | <b>27.7</b> | <b>21.2</b> | <b>23.9</b> | <b>31.7</b> | <b>21.0</b> | <b>16.0</b> | <b>19.5</b> | <b>23.1</b> | <b>26.1</b> | <b>32.6</b> | <b>54.5</b> | <b>49.6</b> | <b>60.5</b> |
| Amoxicillin               | 11.8        | 13.5        | 26.0        | 24.8        | 17.6        | 22.5        | 30.3        | 20.1        | 14.5        | 18.6        | 21.6        | 24.3        | 30.9        | 53.0        | 48.7        | 58.9        |
| Benzylpenicilin           | 2.1         | 6.7         | 2.7         | 3.0         | 3.6         | 1.4         | 1.4         | 0.9         | 1.5         | 0.9         | 1.5         | 1.8         | 1.8         | 1.4         | 0.9         | 1.6         |
| Penethamate               | .           | 0.0         | 0.0         | 0.0         | .           | .           | .           | .           | .           | .           | .           | .           | .           | .           | .           | .           |
| <b>Σ Pleuromutilins</b>   | <b>0.6</b>  | <b>0.8</b>  | <b>0.7</b>  | <b>0.7</b>  | <b>0.8</b>  | <b>0.6</b>  | <b>4.0</b>  | <b>1.7</b>  | <b>1.1</b>  | <b>0.7</b>  | <b>0.5</b>  | <b>1.3</b>  | <b>0.6</b>  | <b>1.0</b>  | <b>0.2</b>  | <b>0.2</b>  |
| Tiamulin                  | 0.6         | 0.8         | 0.7         | 0.7         | 0.8         | 0.6         | 4.0         | 1.7         | 1.1         | 0.7         | 0.5         | 1.3         | 0.6         | 1.0         | 0.2         | 0.2         |
| <b>Σ Polymyxins</b>       | <b>2.7</b>  | <b>1.7</b>  | <b>10.1</b> | <b>11.8</b> | <b>0.1</b>  | <b>0.2</b>  | <b>2.6</b>  | <b>0.3</b>  | <b>0.3</b>  | .           | .           | .           | <b>0.0</b>  | .           | <b>0.1</b>  | <b>0.0</b>  |
| Colistin                  | 0.4         | .           | 1.3         | 7.2         | .           | 0.1         | 2.6         | 0.3         | 0.3         | .           | .           | .           | 0.0         | .           | 0.1         | 0.0         |
| With ZnO                  | 2.3         | 1.7         | 8.8         | 4.6         | 0.1         | 0.1         | .           | .           | .           | .           | .           | .           | .           | .           | .           | .           |
| <b>Σ Sulfonamides</b>     | <b>7.6</b>  | <b>9.0</b>  | <b>8.3</b>  | <b>8.3</b>  | <b>16.4</b> | <b>15.6</b> | <b>16.5</b> | <b>20.2</b> | <b>22.3</b> | <b>16.4</b> | <b>15.3</b> | <b>17.6</b> | <b>15.5</b> | <b>8.9</b>  | <b>10.6</b> | <b>7.6</b>  |
| Sulfadiazine              | 6.1         | 8.5         | 6.9         | 6.9         | 11.7        | 9.3         | 9.9         | 14.0        | 14.8        | 0.7         | 0.0         | .           | 1.0         | .           | .           | .           |
| Sulfadimethoxine          | .           | 0.0         | 0.2         | .           | 2.5         | 3.6         | 3.6         | 3.2         | 4.5         | 12.6        | 10.8        | 11.7        | 8.4         | 4.4         | 7.4         | 4.5         |
| Sulfadimidine             | 1.3         | 0.4         | 1.0         | 1.2         | 1.9         | 2.5         | 2.9         | 3.0         | 3.0         | 3.1         | 4.5         | 5.9         | 6.1         | 4.4         | 3.2         | 3.1         |
| Sulfadoxine               | 0.1         | 0.1         | 0.2         | 0.2         | 0.3         | 0.2         | 0.1         | 0.0         | 0.0         | 0.0         | 0.1         | 0.1         | 0.0         | .           | .           | .           |
| <b>Σ Tetracyclines</b>    | <b>23.4</b> | <b>41.7</b> | <b>32.6</b> | <b>28.4</b> | <b>18.7</b> | <b>19.5</b> | <b>11.7</b> | <b>18.1</b> | <b>26.1</b> | <b>34.7</b> | <b>33.9</b> | <b>26.9</b> | <b>14.4</b> | <b>14.4</b> | <b>17.5</b> | <b>13.6</b> |
| Chlortetracycline         | 1.3         | 7.4         | 12.2        | 2.4         | 2.8         | 1.3         | 1.2         | 1.9         | 3.1         | 4.3         | 3.2         | 2.9         | 3.4         | 1.6         | 0.6         | 0.5         |
| Doxycycline               | 4.5         | 4.3         | 7.9         | 4.6         | 10.6        | 10.1        | 7.3         | 14.4        | 18.9        | 29.0        | 26.8        | 22.5        | 9.8         | 12.2        | 16.5        | 12.7        |
| Oxytetracycline           | 0.4         | 0.2         | 0.1         | 0.1         | 0.4         | 0.5         | 2.1         | 1.8         | 0.7         | 0.7         | 3.7         | 1.5         | 1.1         | 0.6         | 0.4         | 0.4         |
| Tetracycline              | 17.3        | 29.9        | 12.4        | 21.3        | 4.8         | 7.6         | 1.1         | .           | 3.5         | 0.8         | 0.2         | .           | .           | .           | .           | .           |
| <b>Σ Trimethoprim</b>     | <b>7.6</b>  | <b>9.0</b>  | <b>8.3</b>  | <b>8.3</b>  | <b>16.4</b> | <b>15.6</b> | <b>16.5</b> | <b>20.2</b> | <b>22.3</b> | <b>16.4</b> | <b>15.3</b> | <b>17.6</b> | <b>15.5</b> | <b>8.9</b>  | <b>10.6</b> | <b>7.6</b>  |
| Trimethoprim              | 7.6         | 9.0         | 8.3         | 8.3         | 16.4        | 15.6        | 16.5        | 20.2        | 22.3        | 16.4        | 15.3        | 17.6        | 15.5        | 8.9         | 10.6        | 7.6         |
| <b>Σ TFW%</b>             | <b>100</b>  |

\*Cephalosporins: Cephalosporins of the third and fourth generation, TFW%: weighted treatment frequency in percent, 13-1 to 20-2: 2013-1 to 2020-2.

**Table S8.** Weighted treatment frequency per active substance in weaners (%) in VetCAB study per half year from 2013-1 to 2020-2.

| <b>Drug class</b>         | <b>13-1</b> | <b>13-2</b> | <b>14-1</b> | <b>14-2</b> | <b>15-1</b> | <b>15-2</b> | <b>16-1</b> | <b>16-2</b> | <b>17-1</b> | <b>17-2</b> | <b>18-1</b> | <b>18-2</b> | <b>19-1</b> | <b>19-2</b> | <b>20-1</b> | <b>20-2</b> |
|---------------------------|-------------|-------------|-------------|-------------|-------------|-------------|-------------|-------------|-------------|-------------|-------------|-------------|-------------|-------------|-------------|-------------|
| <b>Active Substance</b>   |             |             |             |             |             |             |             |             |             |             |             |             |             |             |             |             |
| <b>Σ Amphenicoles</b>     | <b>0.1</b>  | <b>0.0</b>  | <b>0.1</b>  | <b>0.1</b>  | <b>0.5</b>  | <b>0.2</b>  | <b>0.7</b>  | <b>1.0</b>  | <b>0.2</b>  | <b>0.3</b>  | <b>0.3</b>  | <b>0.4</b>  | <b>0.8</b>  | <b>0.5</b>  | <b>0.2</b>  | <b>0.1</b>  |
| Florfenicol               | 0.1         | 0.0         | 0.1         | 0.1         | 0.5         | 0.2         | 0.7         | 1.0         | 0.2         | 0.3         | 0.3         | 0.4         | 0.8         | 0.5         | 0.2         | 0.1         |
| <b>Σ Aminoglycosides</b>  | <b>4.0</b>  | <b>2.1</b>  | <b>2.3</b>  | <b>2.0</b>  | <b>2.9</b>  | <b>1.8</b>  | <b>2.8</b>  | <b>2.9</b>  | <b>4.5</b>  | <b>3.1</b>  | <b>2.3</b>  | <b>0.5</b>  | <b>2.3</b>  | <b>6.1</b>  | <b>2.5</b>  | <b>1.1</b>  |
| Apramycin                 | .           | 0.0         | 0.1         | .           | 0.2         | .           | .           | 0.3         | 0.4         | .           | .           | .           | .           | .           | .           | .           |
| Dihydrostreptomycin       | 0.2         | 0.1         | 0.0         | .           | 0.1         | 0.1         | 0.0         | 0.0         | 0.0         | 0.0         | 0.0         | 0.0         | .           | 0.0         | .           | .           |
| Gentamicin                | 0.0         | 0.0         | 0.0         | 0.0         | 0.0         | 0.0         | 0.0         | 0.0         | 0.0         | .           | 0.0         | .           | .           | .           | .           | .           |
| Neomycin                  | 3.8         | 2.0         | 1.9         | 1.5         | 2.1         | 1.6         | 2.7         | 1.4         | 3.8         | 3.1         | 2.2         | 0.5         | 2.2         | 6.0         | 2.4         | 1.0         |
| Spectinomycin             | 0.0         | 0.0         | 0.3         | 0.5         | 0.4         | 0.0         | 0.0         | 1.1         | 0.4         | 0.0         | 0.0         | 0.0         | 0.1         | 0.1         | 0.1         | 0.1         |
| <b>Σ Cephalosporins*</b>  | <b>0.2</b>  | <b>0.2</b>  | <b>0.2</b>  | <b>0.2</b>  | <b>0.2</b>  | <b>0.2</b>  | <b>0.4</b>  | <b>0.1</b>  | <b>0.3</b>  | <b>0.2</b>  | <b>0.1</b>  | <b>0.0</b>  | <b>0.2</b>  | <b>0.2</b>  | <b>0.2</b>  | <b>0.3</b>  |
| Cefquinome                | 0.1         | 0.1         | 0.1         | 0.2         | 0.2         | 0.2         | 0.2         | 0.1         | 0.2         | 0.2         | 0.1         | 0.0         | 0.1         | 0.2         | 0.2         | 0.2         |
| Ceftiofur                 | 0.1         | 0.1         | 0.0         | 0.1         | 0.1         | 0.1         | 0.3         | 0.0         | 0.0         | 0.0         | .           | 0.0         | 0.1         | .           | 0.0         | 0.1         |
| <b>Σ Fluoroquinolones</b> | <b>0.3</b>  | <b>0.3</b>  | <b>0.5</b>  | <b>0.3</b>  | <b>0.7</b>  | <b>0.8</b>  | <b>1.0</b>  | <b>0.9</b>  | <b>1.0</b>  | <b>0.9</b>  | <b>0.8</b>  | <b>0.6</b>  | <b>0.7</b>  | <b>0.8</b>  | <b>0.9</b>  | <b>0.7</b>  |
| Danofloxacin              | 0.0         | 0.0         | 0.0         | 0.0         | 0.0         | 0.1         | 0.1         | 0.0         | 0.1         | 0.1         | 0.1         | 0.0         | 0.1         | 0.1         | 0.0         | 0.1         |
| Enrofloxacin              | 0.3         | 0.2         | 0.4         | 0.2         | 0.5         | 0.6         | 0.9         | 0.9         | 0.9         | 0.8         | 0.7         | 0.4         | 0.5         | 0.6         | 0.8         | 0.6         |
| Marbofloxacin             | 0.0         | 0.0         | 0.0         | 0.0         | 0.2         | 0.0         | .           | .           | 0.0         | 0.0         | 0.1         | 0.2         | 0.1         | 0.1         | 0.1         | 0.0         |
| <b>Σ Lincosamides</b>     | <b>0.7</b>  | <b>2.2</b>  | <b>1.1</b>  | <b>0.6</b>  | <b>0.4</b>  | <b>0.0</b>  | <b>0.0</b>  | <b>1.3</b>  | <b>0.4</b>  | <b>0.0</b>  | <b>0.0</b>  | <b>0.0</b>  | <b>0.1</b>  | <b>0.1</b>  | <b>0.1</b>  | <b>0.2</b>  |
| Lincomycin                | 0.7         | 2.2         | 1.1         | 0.6         | 0.4         | 0.0         | 0.0         | 1.3         | 0.4         | 0.0         | 0.0         | 0.0         | 0.1         | 0.1         | 0.1         | 0.2         |
| <b>Σ Macrolides</b>       | <b>5.5</b>  | <b>2.7</b>  | <b>3.3</b>  | <b>2.8</b>  | <b>10.9</b> | <b>6.4</b>  | <b>9.1</b>  | <b>3.3</b>  | <b>1.5</b>  | <b>1.7</b>  | <b>5.6</b>  | <b>5.8</b>  | <b>4.8</b>  | <b>4.0</b>  | <b>3.8</b>  | <b>3.9</b>  |
| Erythromycin              | .           | .           | 0.0         | 0.0         | .           | .           | .           | .           | .           | .           | .           | .           | .           | .           | .           | .           |
| Tildipirosin              | 0.0         | 0.0         | 0.0         | 0.0         | 0.2         | 0.1         | 0.7         | 0.2         | 0.1         | 0.3         | 0.3         | 0.4         | 0.4         | 0.0         | 0.0         | 0.1         |
| Tilmicosin                | 0.6         | .           | 0.3         | 0.4         | 1.4         | 1.1         | 0.2         | 0.1         | 0.1         | 0.4         | 0.4         | 0.0         | 0.1         | 0.0         | 0.2         | 0.5         |
| Tulathromycin             | 0.2         | 0.2         | 0.5         | 0.9         | 3.5         | 2.4         | 0.1         | 0.7         | 0.5         | 0.5         | 4.0         | 4.5         | 2.1         | 0.2         | 0.2         | 0.6         |
| Tylosin                   | 4.7         | 2.6         | 2.5         | 1.5         | 5.7         | 2.8         | 8.1         | 2.4         | 0.9         | 0.4         | 0.9         | 0.8         | 2.3         | 3.8         | 3.3         | 2.8         |
| <b>Σ Penicillins</b>      | <b>30.5</b> | <b>33.6</b> | <b>35.1</b> | <b>36.8</b> | <b>36.1</b> | <b>40.7</b> | <b>37.2</b> | <b>42.1</b> | <b>40.1</b> | <b>44.2</b> | <b>40.3</b> | <b>44.6</b> | <b>33.4</b> | <b>40.9</b> | <b>43.1</b> | <b>46.5</b> |
| Amoxicillin               | 30.3        | 33.4        | 34.9        | 36.7        | 35.9        | 40.5        | 37.1        | 41.9        | 39.8        | 43.9        | 40.1        | 44.6        | 33.4        | 40.8        | 43.0        | 46.4        |
| Benzylpenicillin          | 0.2         | 0.2         | 0.2         | 0.1         | 0.2         | 0.2         | 0.1         | 0.2         | 0.3         | 0.3         | 0.2         | 0.0         | 0.0         | 0.1         | 0.1         | 0.1         |
| <b>Σ Pleuromutilins</b>   | <b>0.7</b>  | <b>0.1</b>  | <b>0.1</b>  | <b>0.2</b>  | <b>0.5</b>  | <b>1.8</b>  | <b>2.2</b>  | <b>1.4</b>  | <b>1.1</b>  | <b>2.5</b>  | <b>3.7</b>  | <b>2.3</b>  | <b>0.8</b>  | <b>1.8</b>  | <b>1.4</b>  | <b>0.9</b>  |
| Tiamulin                  | 0.7         | 0.1         | 0.1         | 0.2         | 0.5         | 1.8         | 2.2         | 1.4         | 1.1         | 2.5         | 3.7         | 2.3         | 0.8         | 1.8         | 1.4         | 0.9         |
| <b>Σ Polymyxins</b>       | <b>32.9</b> | <b>33.9</b> | <b>33.4</b> | <b>36.1</b> | <b>22.6</b> | <b>24.1</b> | <b>18.9</b> | <b>19.1</b> | <b>25.6</b> | <b>25.5</b> | <b>24.3</b> | <b>21.3</b> | <b>27.4</b> | <b>23.9</b> | <b>23.9</b> | <b>19.2</b> |
| Colistin                  | 14.7        | 16.3        | 16.8        | 25.5        | 16.7        | 21.1        | 13.8        | 18.9        | 25.3        | 24.8        | 24.2        | 21.3        | 27.4        | 18.8        | 20.2        | 13.3        |
| Colistin with ZnO         | 18.2        | 17.6        | 16.6        | 10.6        | 5.9         | 3.0         | 5.1         | 0.2         | 0.3         | 0.7         | 0.1         | .           | .           | 5.1         | 3.7         | 5.9         |
| <b>Σ Sulfonamides</b>     | <b>1.9</b>  | <b>1.4</b>  | <b>2.0</b>  | <b>1.4</b>  | <b>3.9</b>  | <b>1.4</b>  | <b>3.2</b>  | <b>2.3</b>  | <b>1.5</b>  | <b>0.8</b>  | <b>0.7</b>  | <b>0.4</b>  | <b>1.2</b>  | <b>0.5</b>  | <b>3.3</b>  | <b>3.4</b>  |
| Sulfadiazine              | 1.8         | 1.4         | 2.0         | 1.4         | 3.5         | 1.4         | 3.2         | 2.3         | 1.4         | 0.2         | 0.5         | 0.1         | 0.3         | .           | 2.3         | 3.2         |
| Sulfadimethoxine          | .           | .           | 0.0         | .           | 0.4         | .           | .           | .           | 0.1         | 0.6         | 0.1         | 0.2         | 0.9         | 0.4         | 0.9         | 0.2         |
| Sulfadimidine             | 0.0         | 0.0         | 0.0         | 0.0         | 0.0         | 0.0         | 0.0         | 0.0         | 0.0         | 0.0         | .           | 0.0         | 0.0         | 0.1         | 0.1         | 0.0         |
| Sulfadoxine               | .           | 0.0         | 0.0         | .           | .           | .           | .           | .           | .           | .           | 0.0         | .           | .           | .           | .           | .           |
| Sulfamethoxazole          | 0.1         | .           | .           | .           | .           | .           | .           | .           | .           | .           | .           | .           | .           | .           | .           | .           |
| <b>Σ Tetracyclines</b>    | <b>21.2</b> | <b>22.1</b> | <b>20.0</b> | <b>17.8</b> | <b>17.5</b> | <b>21.2</b> | <b>21.3</b> | <b>23.3</b> | <b>22.2</b> | <b>20.0</b> | <b>21.2</b> | <b>23.6</b> | <b>27.1</b> | <b>20.6</b> | <b>17.2</b> | <b>20.4</b> |
| Chlortetracycline         | 2.0         | 1.6         | 1.7         | 2.0         | 4.1         | 1.6         | .           | 0.5         | 3.4         | 2.4         | 2.4         | 1.8         | 2.9         | 0.6         | 1.5         | 1.5         |
| Doxycycline               | 14.5        | 13.9        | 13.5        | 14.2        | 10.3        | 16.9        | 20.5        | 22.3        | 18.5        | 17.0        | 17.9        | 20.9        | 23.6        | 19.5        | 15.5        | 18.7        |
| Oxytetracycline           | 0.1         | 0.0         | 0.0         | 0.0         | 0.2         | 0.2         | 0.6         | 0.5         | 0.3         | 0.3         | 0.7         | 0.9         | 0.6         | 0.5         | 0.2         | 0.2         |
| Tetracycline              | 4.6         | 6.6         | 4.7         | 1.7         | 2.9         | 2.4         | 0.2         | 0.0         | .           | 0.4         | 0.2         | .           | .           | .           | .           | .           |
| <b>Σ Trimethoprim</b>     | <b>1.9</b>  | <b>1.4</b>  | <b>2.0</b>  | <b>1.4</b>  | <b>3.9</b>  | <b>1.4</b>  | <b>3.2</b>  | <b>2.3</b>  | <b>1.5</b>  | <b>0.8</b>  | <b>0.7</b>  | <b>0.4</b>  | <b>1.2</b>  | <b>0.5</b>  | <b>3.2</b>  | <b>3.4</b>  |
| Trimethoprim              | 1.9         | 1.4         | 2.0         | 1.4         | 3.9         | 1.4         | 3.2         | 2.3         | 1.5         | 0.8         | 0.7         | 0.4         | 1.2         | 0.5         | 3.2         | 3.4         |
| <b>Σ TFw%</b>             | <b>100</b>  |

\*Cephalosporins: Cephalosporins of the third and fourth generation, TFw%: weighted treatment frequency in percent, 13-1 to 20-2: 2013-1 to 2020-2.

**Table S9.** Weighted treatment frequency per active substance in fattening pigs (%) in VetCAb study per half year from 2013-1 to 2020-2.

| Drug class                | 13-1        | 13-2        | 14-1        | 14-2        | 15-1        | 15-2        | 16-1        | 16-2        | 17-1        | 17-2        | 18-1        | 18-2        | 19-1        | 19-2        | 20-1        | 20-2        |
|---------------------------|-------------|-------------|-------------|-------------|-------------|-------------|-------------|-------------|-------------|-------------|-------------|-------------|-------------|-------------|-------------|-------------|
| Active Substance          |             |             |             |             |             |             |             |             |             |             |             |             |             |             |             |             |
| <b>Σ Amphenicoles</b>     | <b>0.2</b>  | <b>0.1</b>  | <b>0.1</b>  | <b>0.1</b>  | <b>1.1</b>  | <b>0.8</b>  | <b>0.8</b>  | <b>0.9</b>  | <b>0.8</b>  | <b>0.7</b>  | <b>1.0</b>  | <b>1.8</b>  | <b>1.6</b>  | <b>1.1</b>  | <b>1.1</b>  | <b>1.4</b>  |
| Florfenicol               | 0.2         | 0.1         | 0.1         | 0.1         | 1.1         | 0.8         | 0.8         | 0.9         | 0.8         | 0.7         | 1.0         | 1.8         | 1.6         | 1.1         | 1.1         | 1.4         |
| <b>Σ Aminoglycosides</b>  | <b>4.7</b>  | <b>1.6</b>  | <b>1.7</b>  | <b>1.2</b>  | <b>2.0</b>  | <b>1.6</b>  | <b>2.2</b>  | <b>1.8</b>  | <b>1.3</b>  | <b>1.9</b>  | <b>2.6</b>  | <b>2.6</b>  | <b>2.2</b>  | <b>1.9</b>  | <b>1.7</b>  | <b>2.9</b>  |
| Apramycin                 | 0.1         | .           | .           | .           | .           | .           | .           | .           | .           | .           | 0.0         | .           | .           | .           | .           | .           |
| Dihydrostreptomycin       | 0.1         | 0.0         | 0.0         | 0.1         | .           | .           | .           | .           | .           | .           | .           | .           | .           | 0.0         | .           | .           |
| Gentamicin                | .           | 0.0         | 0.0         | .           | 0.0         | 0.0         | .           | .           | .           | .           | .           | .           | .           | 0.0         | .           | .           |
| Neomycin                  | 0.6         | 0.6         | 0.7         | 0.1         | 0.7         | 0.3         | 1.9         | 0.3         | 0.8         | 1.2         | 1.8         | 1.4         | 1.2         | 0.4         | 0.3         | .           |
| Spectinomycin             | 3.9         | 1.0         | 1.0         | 1.1         | 1.3         | 1.3         | 0.3         | 1.5         | 0.5         | 0.7         | 0.7         | 1.2         | 1.1         | 1.5         | 1.4         | 2.9         |
| <b>Σ Cephalosporins*</b>  | <b>0.1</b>  | <b>0.1</b>  | <b>0.2</b>  | <b>0.1</b>  | <b>0.3</b>  | <b>0.2</b>  | <b>0.1</b>  | <b>0.1</b>  | <b>0.1</b>  | <b>0.1</b>  | <b>0.1</b>  | <b>0.0</b>  | <b>0.0</b>  | <b>0.0</b>  | <b>0.0</b>  | <b>0.0</b>  |
| Cefquinome                | 0.1         | 0.1         | 0.2         | 0.1         | 0.2         | 0.1         | 0.0         | 0.0         | 0.1         | 0.0         | 0.1         | 0.0         | 0.0         | 0.0         | 0.0         | 0.0         |
| Ceftiofur                 | 0.0         | 0.0         | 0.0         | 0.0         | 0.1         | 0.0         | 0.1         | 0.0         | 0.1         | 0.1         | 0.0         | .           | .           | .           | .           | .           |
| <b>Σ Fluoroquinolones</b> | <b>0.9</b>  | <b>0.8</b>  | <b>0.9</b>  | <b>0.8</b>  | <b>1.8</b>  | <b>1.7</b>  | <b>1.8</b>  | <b>3.1</b>  | <b>2.8</b>  | <b>2.6</b>  | <b>2.5</b>  | <b>1.6</b>  | <b>1.7</b>  | <b>0.8</b>  | <b>1.4</b>  | <b>0.9</b>  |
| Danofloxacin              | 0.3         | 0.4         | 0.3         | 0.3         | 0.5         | 0.4         | 0.6         | 0.8         | 1.1         | 1.2         | 0.5         | 0.4         | 0.7         | 0.5         | 0.8         | 0.4         |
| Enrofloxacin              | 0.6         | 0.4         | 0.5         | 0.4         | 0.9         | 0.9         | 1.1         | 1.1         | 1.2         | 1.1         | 1.5         | 0.3         | 0.3         | 0.2         | 0.4         | 0.3         |
| Marbofloxacin             | 0.0         | 0.1         | 0.1         | 0.1         | 0.4         | 0.5         | 0.1         | 1.2         | 0.6         | 0.3         | 0.6         | 0.9         | 0.7         | 0.2         | 0.2         | 0.2         |
| <b>Σ Lincosamides</b>     | <b>5.6</b>  | <b>2.9</b>  | <b>2.3</b>  | <b>1.9</b>  | <b>3.2</b>  | <b>2.5</b>  | <b>0.6</b>  | <b>2.3</b>  | <b>1.5</b>  | <b>3.5</b>  | <b>2.2</b>  | <b>3.9</b>  | <b>2.9</b>  | <b>3.1</b>  | <b>2.7</b>  | <b>3.6</b>  |
| Lincomycin                | 5.6         | 2.9         | 2.3         | 1.9         | 3.2         | 2.5         | 0.6         | 2.3         | 1.5         | 3.5         | 2.2         | 3.9         | 2.9         | 3.1         | 2.7         | 3.6         |
| <b>Σ Macrolides</b>       | <b>16.1</b> | <b>12.8</b> | <b>14.2</b> | <b>11.9</b> | <b>14.1</b> | <b>15.4</b> | <b>11.8</b> | <b>11.4</b> | <b>9.8</b>  | <b>18.8</b> | <b>13.1</b> | <b>8.2</b>  | <b>12.7</b> | <b>11.0</b> | <b>16.6</b> | <b>23.6</b> |
| Erythromycin              | .           | 0.0         | 0.0         | 0.0         | .           | 0.0         | .           | .           | .           | .           | .           | .           | .           | .           | .           | .           |
| Tildipirosin              | 0.0         | 0.0         | 0.0         | 0.0         | 0.8         | 0.3         | 0.8         | 0.6         | 0.3         | 0.3         | 0.5         | 0.7         | 0.7         | 0.1         | 0.1         | 0.2         |
| Tilmicosin                | .           | .           | .           | .           | 0.2         | 0.3         | .           | .           | .           | .           | .           | .           | .           | .           | .           | .           |
| Tulathromycin             | 0.2         | 0.1         | 0.2         | 0.1         | 0.2         | 0.2         | 0.0         | 0.0         | 0.1         | 0.0         | 0.3         | 0.2         | 0.7         | 0.2         | 0.0         | 0.2         |
| Tylosin                   | 15.9        | 12.7        | 14.0        | 11.8        | 13.0        | 14.6        | 10.9        | 10.8        | 9.4         | 18.4        | 12.3        | 7.3         | 11.4        | 10.7        | 16.5        | 23.2        |
| Tylvalosin                | .           | 0.0         | .           | .           | .           | .           | .           | .           | .           | .           | .           | .           | .           | .           | .           | .           |
| <b>Σ Penicillins</b>      | <b>26.2</b> | <b>30.9</b> | <b>33.2</b> | <b>30.9</b> | <b>31.2</b> | <b>32.7</b> | <b>35.0</b> | <b>37.1</b> | <b>30.7</b> | <b>33.5</b> | <b>31.2</b> | <b>33.3</b> | <b>30.6</b> | <b>32.7</b> | <b>28.0</b> | <b>29.1</b> |
| Amoxicillin               | 25.8        | 30.5        | 32.6        | 30.4        | 30.6        | 31.8        | 34.6        | 36.5        | 30.1        | 32.8        | 30.5        | 32.9        | 30.3        | 32.3        | 27.5        | 28.3        |
| Ampicillin                | .           | 0.1         | 0.1         | .           | .           | .           | .           | .           | .           | .           | .           | .           | .           | .           | .           | .           |
| Benzylpenicilin           | 0.4         | 0.3         | 0.4         | 0.5         | 0.7         | 0.8         | 0.4         | 0.6         | 0.6         | 0.7         | 0.6         | 0.4         | 0.3         | 0.4         | 0.6         | 0.8         |
| <b>Σ Pleuromutilins</b>   | <b>5.9</b>  | <b>5.6</b>  | <b>4.1</b>  | <b>7.0</b>  | <b>4.9</b>  | <b>5.8</b>  | <b>11.7</b> | <b>7.3</b>  | <b>13.0</b> | <b>6.7</b>  | <b>11.2</b> | <b>15.8</b> | <b>15.3</b> | <b>12.2</b> | <b>10.2</b> | <b>7.9</b>  |
| Tiamulin                  | 5.9         | 5.6         | 4.1         | 7.0         | 4.9         | 5.8         | 11.7        | 7.3         | 13.0        | 6.7         | 11.2        | 15.8        | 15.4        | 12.2        | 10.2        | 7.9         |
| <b>Σ Polymyxins</b>       | <b>8.2</b>  | <b>14.1</b> | <b>12.5</b> | <b>12.4</b> | <b>3.8</b>  | <b>4.9</b>  | <b>7.6</b>  | <b>3.0</b>  | <b>3.0</b>  | <b>6.5</b>  | <b>3.6</b>  | <b>4.5</b>  | <b>5.0</b>  | <b>3.4</b>  | <b>1.5</b>  | <b>2.4</b>  |
| Colistin                  | 8.2         | 14.1        | 12.4        | 12.3        | 3.8         | 4.9         | 7.6         | 2.9         | 2.6         | 5.9         | 3.6         | 4.4         | 4.7         | 3.4         | 1.5         | 2.4         |
| Colistin with ZnO         | .           | .           | 0.1         | 0.1         | .           | 0.0         | .           | 0.1         | 0.4         | 0.6         | .           | 0.1         | 0.3         | .           | .           | .           |
| <b>Σ Sulfonamides</b>     | <b>3.6</b>  | <b>2.3</b>  | <b>2.3</b>  | <b>2.4</b>  | <b>1.8</b>  | <b>0.9</b>  | <b>0.5</b>  | <b>0.9</b>  | <b>0.2</b>  | <b>0.5</b>  | .           | <b>0.1</b>  | <b>0.0</b>  | <b>0.1</b>  | <b>0.1</b>  | <b>0.1</b>  |
| Sulfadiazine              | 3.5         | 2.2         | 2.2         | 2.3         | 1.8         | 0.8         | 0.5         | .           | 0.2         | 0.3         | .           | 0.1         | 0.0         | .           | 0.1         | .           |
| Sulfadimethoxine          | 0.0         | 0.0         | .           | .           | .           | .           | .           | 0.9         | .           | 0.1         | .           | .           | .           | 0.1         | .           | .           |
| Sulfadimidine             | 0.0         | 0.0         | 0.0         | 0.0         | 0.0         | 0.0         | 0.0         | 0.0         | 0.0         | 0.0         | .           | 0.0         | 0.0         | .           | 0.0         | 0.0         |
| Sulfadoxine               | 0.0         | 0.0         | 0.0         | 0.0         | 0.0         | 0.1         | .           | .           | 0.0         | 0.0         | .           | .           | .           | 0.0         | 0.0         | 0.1         |
| <b>Σ Tetracyclines</b>    | <b>24.9</b> | <b>26.5</b> | <b>26.3</b> | <b>28.8</b> | <b>33.9</b> | <b>32.6</b> | <b>27.4</b> | <b>31.3</b> | <b>36.4</b> | <b>24.7</b> | <b>32.5</b> | <b>28.2</b> | <b>27.9</b> | <b>33.5</b> | <b>36.4</b> | <b>28.1</b> |
| Chlortetracycline         | 8.1         | 9.0         | 10.0        | 5.8         | 5.1         | 3.1         | 0.1         | .           | 0.1         | 0.2         | 0.3         | 0.8         | 0.1         | .           | 0.1         | 2.3         |
| Doxycycline               | 13.1        | 9.5         | 9.9         | 13.0        | 25.4        | 27.0        | 26.5        | 31.3        | 36.1        | 24.3        | 31.4        | 26.9        | 26.7        | 32.4        | 35.4        | 25.2        |
| Oxytetracycline           | 0.1         | 0.1         | 0.1         | 0.0         | 0.2         | 0.2         | 0.2         | 0.0         | 0.1         | 0.1         | 0.3         | 0.5         | 1.1         | 1.1         | 0.9         | 0.7         |
| Tetracycline              | 3.6         | 7.8         | 6.2         | 10.0        | 3.3         | 2.4         | 0.5         | .           | 0.0         | 0.1         | 0.5         | .           | .           | .           | .           | 0.0         |
| <b>Σ Trimethoprim</b>     | <b>3.6</b>  | <b>2.3</b>  | <b>2.3</b>  | <b>2.4</b>  | <b>1.8</b>  | <b>0.9</b>  | <b>0.5</b>  | <b>0.9</b>  | <b>0.2</b>  | <b>0.5</b>  | .           | <b>0.1</b>  | <b>0.0</b>  | <b>0.1</b>  | <b>0.1</b>  | <b>0.1</b>  |
| Trimethoprim              | 3.6         | 2.3         | 2.3         | 2.4         | 1.8         | 0.9         | 0.5         | 0.9         | 0.2         | 0.5         | .           | 0.1         | 0.0         | 0.1         | 0.1         | 0.1         |
| <b>Σ TFw%</b>             | <b>100</b>  |

\*Cephalosporins: Cephalosporins of the third and fourth generation, TFw%: weighted treatment frequency in percent, 13-1 to 20-2: 2013-1 to 2020-2.



**Figure S1.** Weighted treatment frequency (%) by WHO, WOA, and EMA classification for piglets in VetCAB study per half year from 2013-1 to 2020-2.

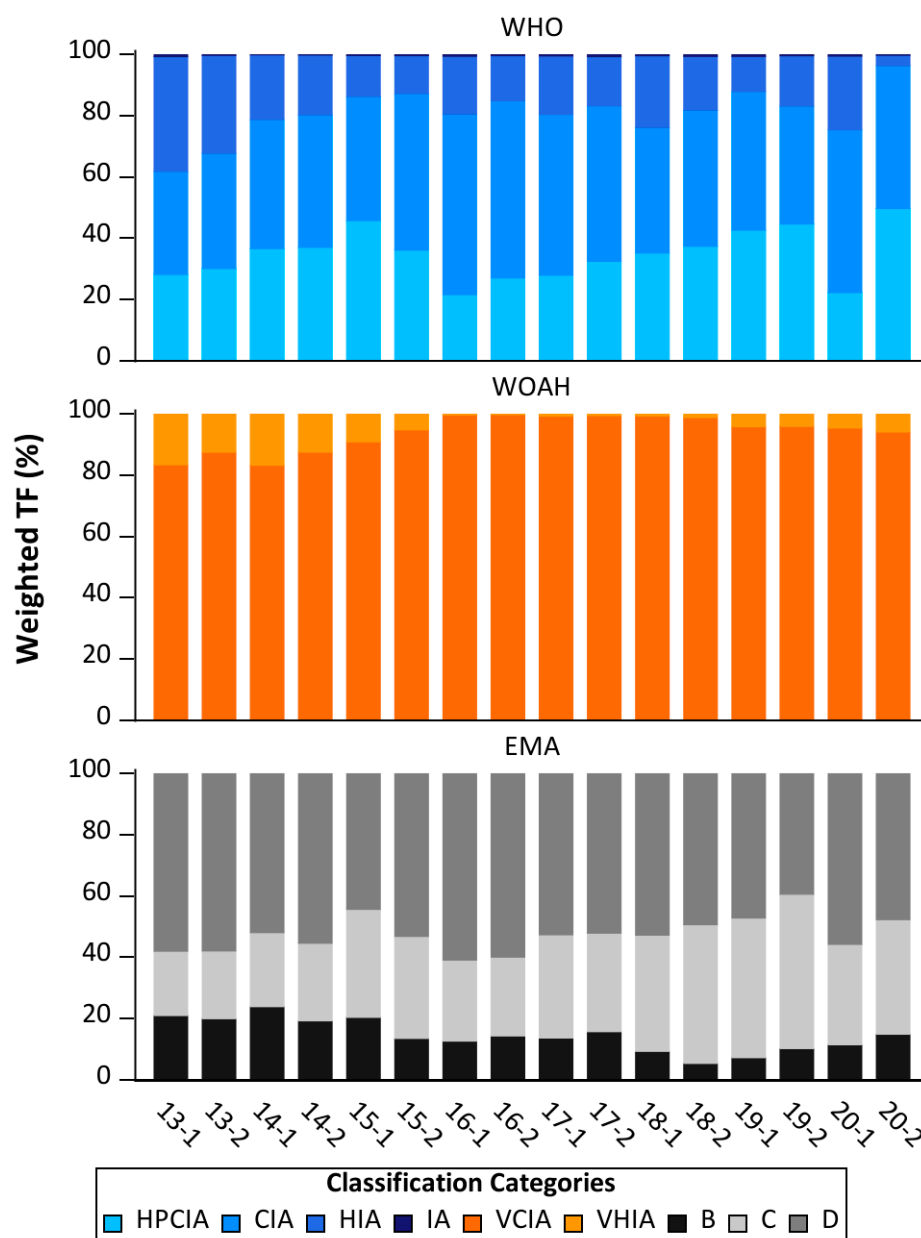

WHO: World Health Organisation, HPCIA: highest priority critically important antimicrobials, CIA: critically important antimicrobials, HIA: highly important antimicrobials, IA: important antimicrobials; WOA: World Organisation for Animal Health, VCIA: veterinary critically important antimicrobials, VHIA: veterinary highly important antimicrobials; EMA: European Medicine Agency, B: restrict, C: caution, D: prudence; 13-1 to 20-2: 2013-1 to 2020-2.

**Figure S2.** Weighted treatment frequency (%) by WHO, WOA, and EMA classification for sows in VetCAB study per half year from 2013-1 to 2020-2.

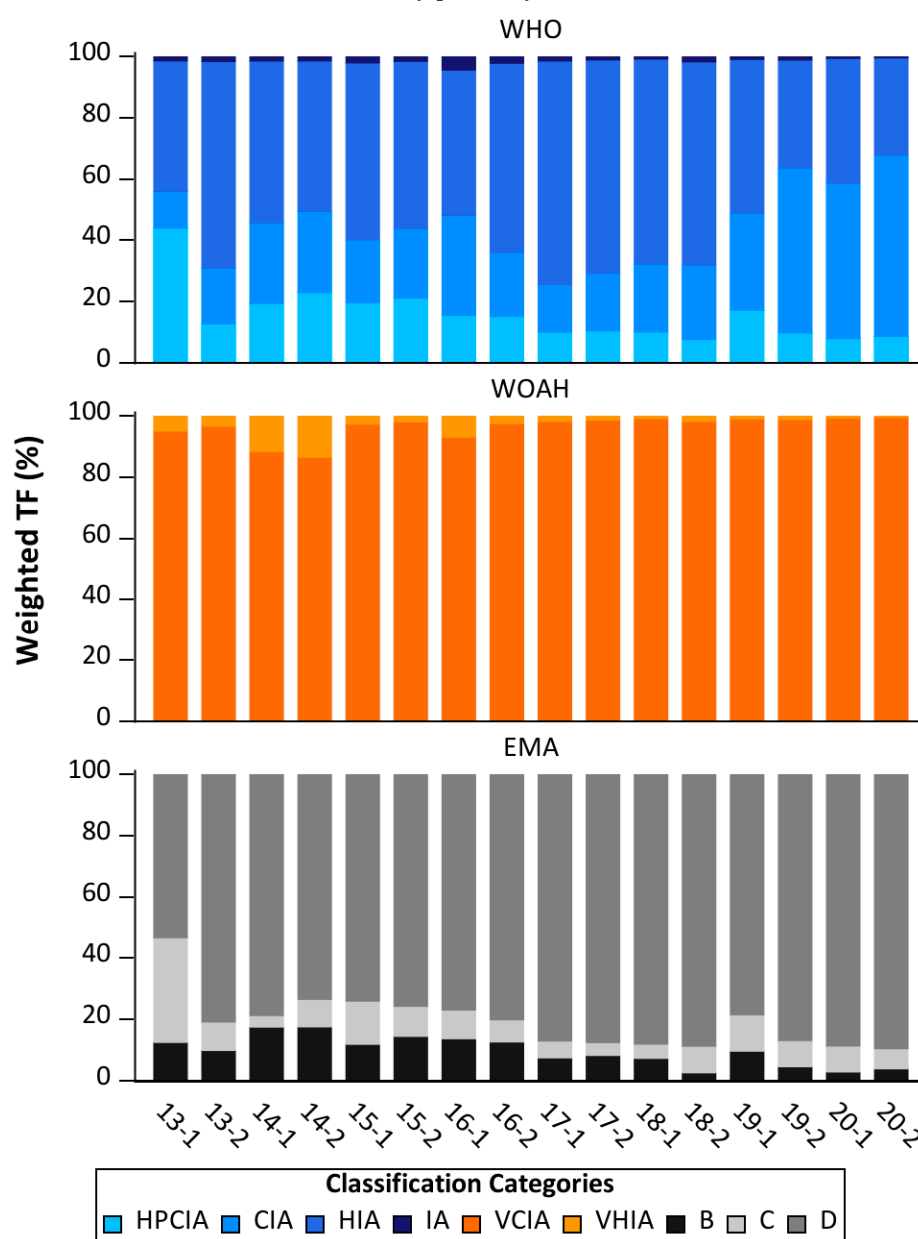

WHO: World Health Organisation, HPCIA: highest priority critically important antimicrobials, CIA: critically important antimicrobials, HIA: highly important antimicrobials, IA: important antimicrobials; WOA: World Organisation for Animal Health, VCIA: veterinary critically important antimicrobials, VHIA: veterinary highly important antimicrobials; EMA: European Medicine Agency, B: restrict, C: caution, D: prudence; 13-1 to 20-2: 2013-1 to 2020-2.

**Figure S3.** Weighted treatment frequency (%) by WHO, WOA, and EMA classification for weaners in VetCAB study per half year from 2013-1 to 2020-2.

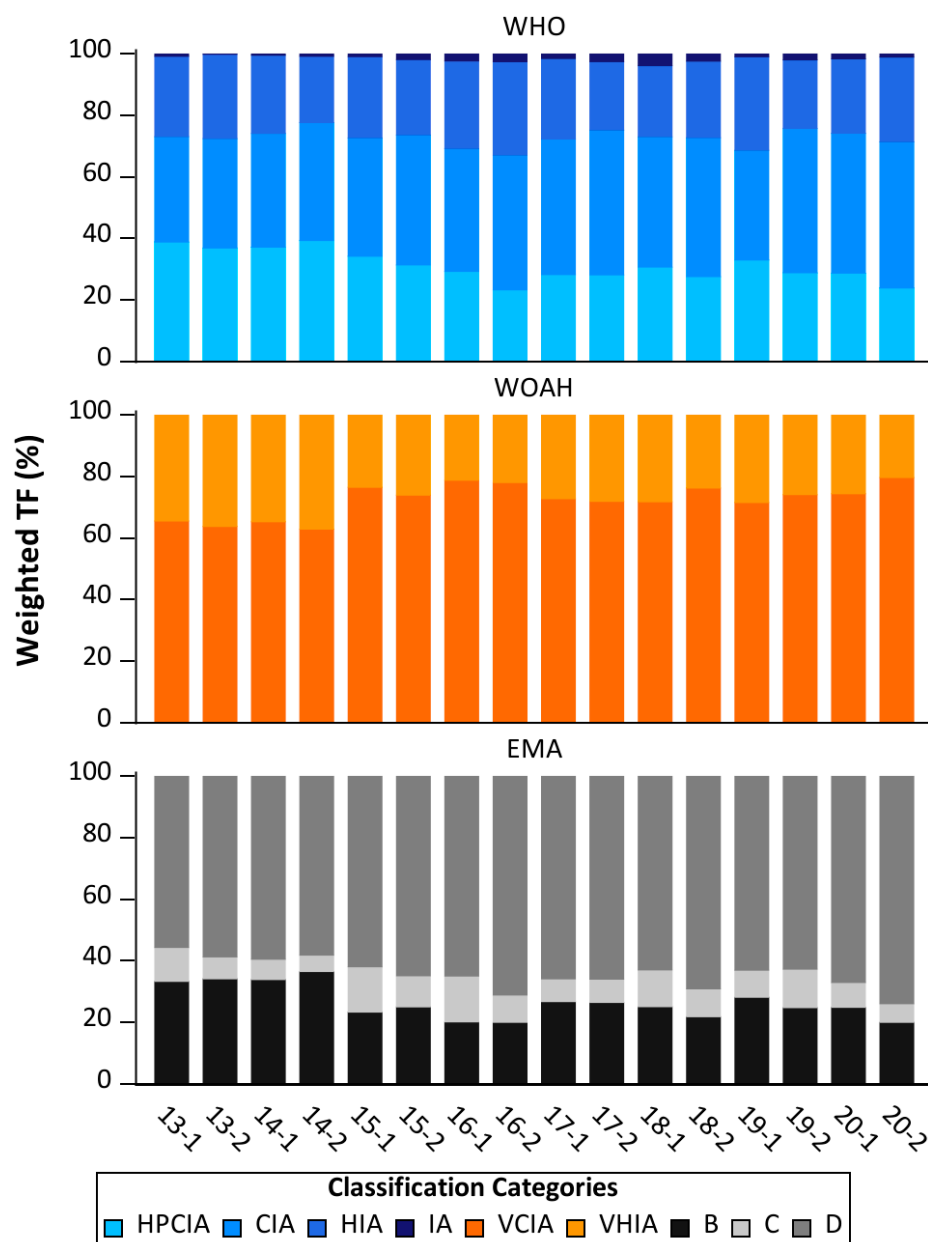

WHO: World Health Organisation, HPCIA: highest priority critically important antimicrobials, CIA: critically important antimicrobials, HIA: highly important antimicrobials, IA: important antimicrobials; WOA: World Organisation for Animal Health, VCIA: veterinary critically important antimicrobials, VHIA: veterinary highly important antimicrobials; EMA: European Medicine Agency, B: restrict, C: caution, D: prudence; 13-1 to 20-2: 2013-1 to 2020-2.

**Figure S4.** Weighted treatment frequency (%) by WHO, WOAH, and EMA classification for Fattening Pigs in VetCAB study per half year from 2013-1 to 2020-2.

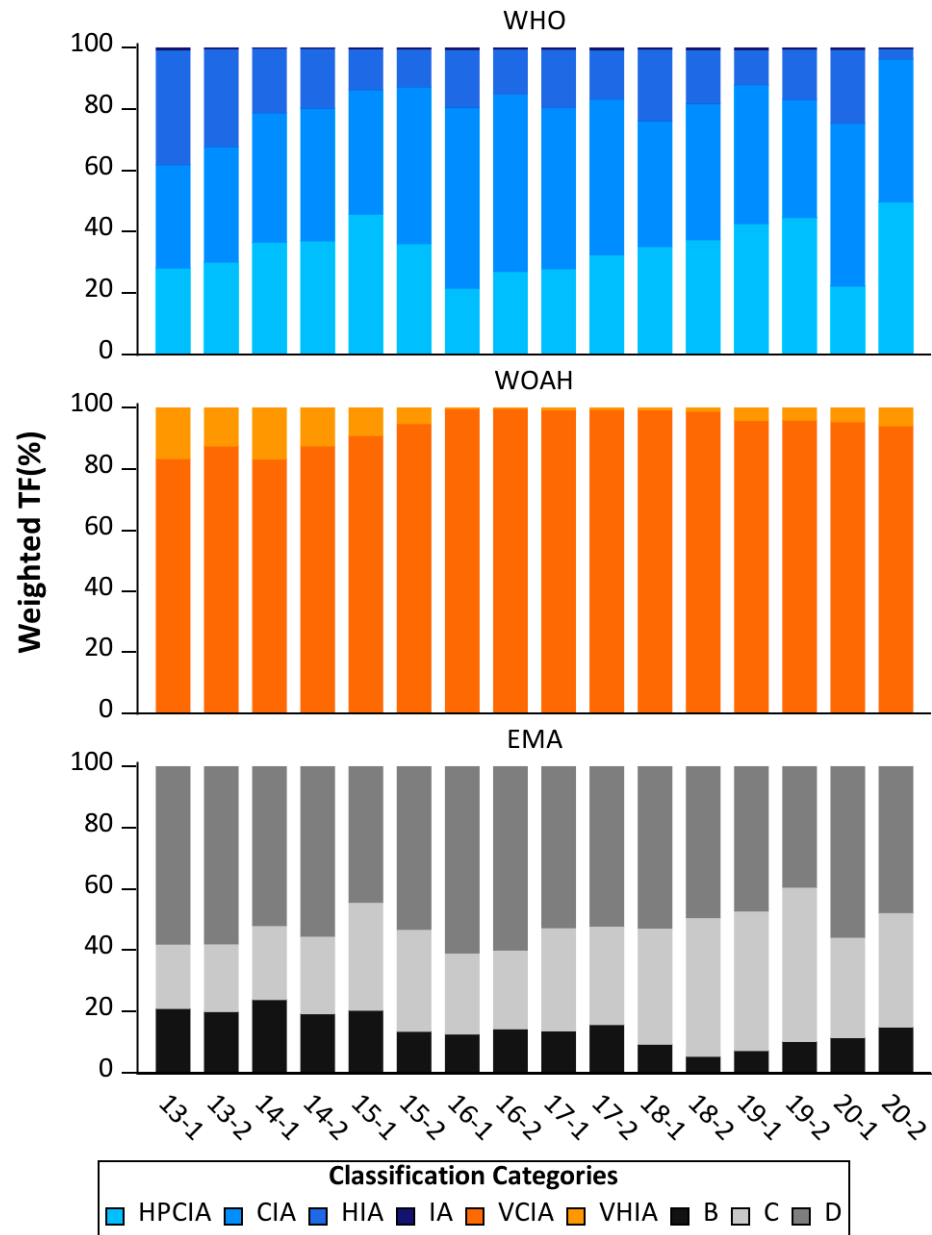

WHO: World Health Organisation, HPCIA: highest priority critically important antimicrobials, CIA: critically important antimicrobials, HIA: highly important antimicrobials, IA: important antimicrobials; WOAH: World Organisation for Animal Health, VCIA: veterinary critically important antimicrobials, VHIA: veterinary highly important antimicrobials; EMA: European Medicine Agency, B: restrict, C: caution, D: prudence; 13-1 to 20-2: 2013-1 to 2020-2.
